# Supplementary material for: Water-soluble carboxymethyl chitosan (WSCC)-modified single-walled carbon nanotubes (SWCNTs) provide efficient adsorption of Pb(ii) from water
Source: Royal Society of Chemistry journal article supplement (doi:10.1039/d2ra00066k), 2022-01-01
Supplement: d2ra00066k1.pdf [file d2ra00066k1.pdf]

## Supporting Information

### Water-soluble carboxymethyl chitosan (WSCC)-modified single-walled carbon nanotubes (SWCNTs) provides an efficient adsorption of Pb (II) from water

Jinling Gao\*, Mingzhe Song, Tongtong Li, Yuyao Zhao, Anxu Wang

College of Science, Heilongjiang Bayi Agricultural University, Daqing, 163319, China

Corresponding author: Jinling Gao ([gjlscl@sina.com](mailto:gjlscl@sina.com))

Fig. S1. TEM image of WSCC-oSWCNTs complex.

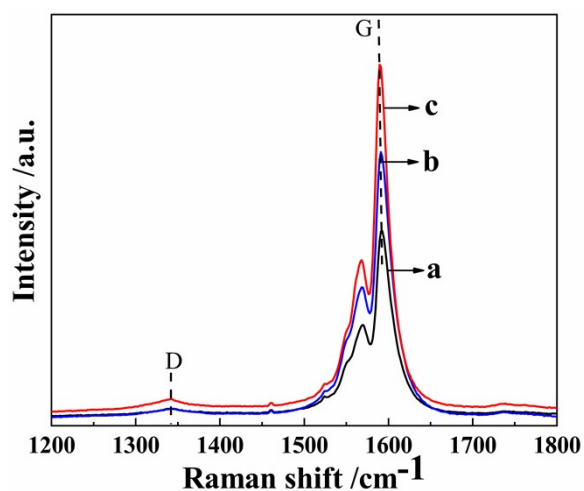

Fig. S2. Raman spectra of (a) SWCNTs, (b) oSWCNTs, and (c) WSCC-oSWCNTs complex.

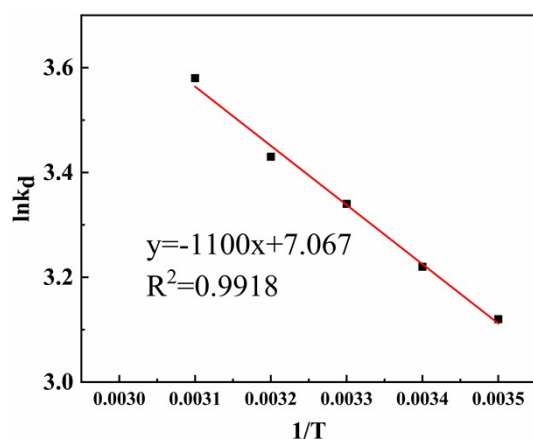

**Fig. S3.** Linear thermodynamic curve of  $\ln k_d$  vs  $1/T$  of Pb (II) adsorption using WSCC-oSWCNTs complex.

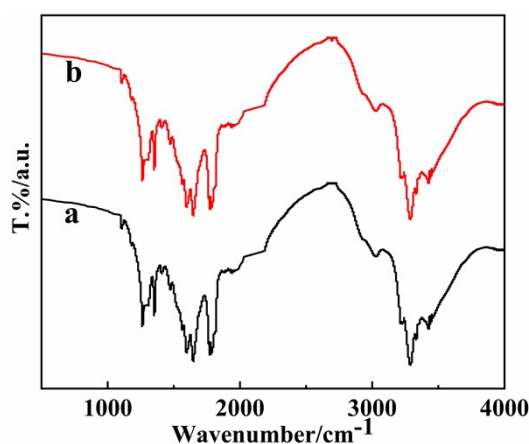

**Fig. S4.** FT-IR spectra of WSCC-oSWCNTs (a) before and (b) after 4 successive cycles of adsorption/desorption process for Pb (II).

**Table S1.** Values of kinetic parameters for Pb (II) from water using WSCC-oSWCNTs complex

| Kinetic Model                | $R^2$ | $k_1$ ( $k_2$ ) | $q_e$ (calculated) | $q_e$ (experimental) |
|------------------------------|-------|-----------------|--------------------|----------------------|
| Pseudo First Order Kinetics  | 0.489 | 0.010           | 1.430              |                      |
| Pseudo Second Order Kinetics | 0.984 | 0.011           | 21.53              | 21.06                |

**Table S2.** Parameter values of adsorption isotherms for Pb (II) from water using WSCC-oSWCNTs complex

| Isotherm model | Parameters | Parameter values          |
|----------------|------------|---------------------------|
| Langmuir       | $R^2$      | 0.9709                    |
|                | $q_m$      | 113.63 mg g <sup>-1</sup> |
|                | $b$        | 1.702 L mg <sup>-1</sup>  |

|                             |           |                                              |
|-----------------------------|-----------|----------------------------------------------|
| Freundlich                  | $R^2$     | 0.9971                                       |
|                             | $K_F$     | 51.62 mg g <sup>-1</sup> /mg L <sup>-1</sup> |
|                             | 1/n       | 0.5698                                       |
| Temkin                      | $R^2$     | 0.8764                                       |
|                             | $k_1$     | 20.86 J mol <sup>-1</sup>                    |
|                             | $k_2$     | 12.03 L g <sup>-1</sup>                      |
| Dubinin–Raduskevich–Kanager | $R^2$     | 0.9182                                       |
|                             | $q_{D-R}$ | 220.7 mg g <sup>-1</sup>                     |
|                             | E         | 1.929 kJ mol <sup>-1</sup>                   |

**Table S3.** Thermodynamic parameters at different temperatures

| Temperature (k) | $\Delta G(KJ \cdot mol^{-1})$ | $\Delta H(KJ \cdot mol^{-1})$ | $\Delta S(KJ \cdot mol^{-1} \cdot K^{-1})$ |
|-----------------|-------------------------------|-------------------------------|--------------------------------------------|
| 293             | -8.07                         | 9.15                          | 58.76                                      |
| 298             | -8.37                         |                               |                                            |
| 303             | -8.66                         |                               |                                            |
| 308             | -8.95                         |                               |                                            |
| 313             | -9.25                         |                               |                                            |

**Table S4.** The Pb (II) ion adsorption in the presence of diverse competing metal ions by the adsorbent

| Ions             | Na <sup>+</sup> | K <sup>+</sup> | Ca <sup>2+</sup> | Mg <sup>2+</sup> | Cd <sup>2+</sup> | Hg <sup>2+</sup> | Al <sup>3+</sup> | Cr <sup>3+</sup> |
|------------------|-----------------|----------------|------------------|------------------|------------------|------------------|------------------|------------------|
| Efficiency/<br>% | 4.52            | 5.68           | 6.37             | 8.86             | 10.47            | 12.56            | 5.31             | 4.69             |
